# Supplementary material
Source: publisher figshare collection journal article supplement (https://tandf.figshare.com/ndownloader/files/21136386)
Supplement: Supplementary file 1 [file 21136386]

**Responses to Reviewer Comments**

The authors thank the reviewers for their thorough comments. We have modified the paper to address each comment from the reviewers. For each comment (**in bold**) we have provided an explanation (in red) of how we addressed the comment including the specific changes to text (in green) in the paper.

**Reviewer 1:**

**This paper tackles a very interesting and complex topic: the determination of an optimal repair strategy following a hazardous event. The reviewer feels that this work has a lot of potential and recognizes the importance of a transportation resilience metric that accounts for both connectivity loss and traffic volume. However, the reviewer feels that a major review is needed for the authors to prove that their optimization algorithm is computationally efficient in comparison with the near optimal heuristic algorithm. Since computational efficiency is one of the main contributions that the author’s claim, it is imperative that the authors provide an estimation of both the heuristic algorithm and the proposed approach. Currently, the manuscript just states that the proposed algorithm (in comparison to the heuristic one) is “relatively short and achievable without significant computational effort” (page 16). The reviewer feels that additional detail is needed to clarify this statement. How was this comparison made? Did the authors run the heuristic algorithm on their own computer system and then compare it to their proposed method? What qualifies as “significant computational effort”?**

Thank you for the many insightful comments. We have completed a major revision of the paper to add clarity and emphasize the contributions. The changes are documented below in terms of both the changes made in response to specific comments and changes made because we felt the need to elaborate on or clarify a point.

The reviewer’s point regarding the lack of specificity in reporting computational effort is well taken. Unfortunately, we do not have the luxury of benchmarking the performance of our algorithm with Hackl et al. (2018a). However, we do know that our algorithm is very fast – a matter of minutes rather than approximately 10 hours reported by Hackl et al. (2018a). We have modified the paragraph containing the statement “relatively short and achievable without significant computational effort”to clarify the magnitude of the improvement as follows (page 18 lines 51 to page 19 lines 3):

“Compared with the heuristic algorithm, determining the criticality of the order is computationally efficient assuming the network is already modelled. The repair order requires running the traffic network assignment for each disrupted segment to determine the MNRI. Hackl et al. (2018a) reports that the solution of the heuristic takes approximately 10 hours, where our solution is determined in a matter of minutes making the method feasible for near real-time decision support.”

1. **On page 9, line 46, the authors note that the criticality in each link may be different from the status after disruption. What is causing this difference and how is it modeled in the different types? It seems that this change would be reflected in a different O-D matrix. However, the authors seem to have the same O-D matrix before and after the disruption.**

The criticality of each link differs before and after an event because criticality is determined based on the capacity of the studied link relative to the status of the overall network (redundant links). We determine criticality before the event by the removing each studied link assuming that all the remaining links are functional. In contrast, we determine criticality after an event by restoring the studied link assuming that all the damaged links and their capacities are known. Therefore, that results in four possible combinations: before an event, full removal or partial removal; and after an event, full or partial restoration. Although the OD demand remains the same, the changes to the network topology cause the results of the criticality analysis to differ. We agree that this requires additional explanation.

The sentences are rewritten (page 10 line 5 to line 48) as:

“Furthermore, the availability of redundant routes may be reflected in the change in total travel cost. That is, a link assumed to be disrupted in an undisrupted network before an event or a link assumed to be repaired in a disrupted network with multiple damaged links after the event, may result in changes in travel cost throughout the network. These changes are used to determine criticality of the link. By considering four alternative circumstances, this paper uses four calculations of MNRI (defined as types) to determine the repair priorities. These are partial/full removal of the studied link before the event and partial/full restoration of the studied link after the event. Although this paper focuses on prioritizing links for network recovery, Type I and II analysis (without any damage) permits comparison with Type III and IV (requiring information on damage) to determine the value of information about damage with respect to network recovery. The four types of MNRI calculations are described as follows:

Type I: pre-event, no disruption, set the capacity of only the studied link to zero

representing a fully closed link due to the damage;

Type II: pre-event, no disruption, set the capacity of only the studied link as partially closed due to the damage;

Type III: post-event, the damage degrees on all damaged links are assumed to be known to specify the capacities of the damaged links and only the studied link is assumed to be restored to full capacity;

Type IV: post-event, the damage degrees on all damaged links are assumed to be known to specify the capacities of the damaged links and only the studied link is assumed to be restored to partial capacity due to resource constraints.”

The question of whether the O-D matrix changes after an event is a different question, but should also be addressed. Clearly the O-D matrix will change after an event and the need for travel may be fundamentally different and users adapt to disruptions to the network. While there is evidence of large surges immediately after an event, in most cases travel will be reduced during the recovery period. In all cases forecasting such changes is well beyond the scope of this work. We believe that using the original O-D matrix is relatively conservative (representative of a worst-case situation). This is now acknowledged in the paper as follows (page 9, lines 44 to line 53):

The origin destination matrix for the network is assumed to remain unchanged after the event. Nicholson and Du (1997) provide a summary of how travel patterns might change after an event. Such changes could be incorporated in these models. Our results are conservative assuming a uniform reduction in travel across a region.

1. **It is unclear to the reviewer why the authors are studying Type I and Type II (page 9, line 56) since this framework is being proposed after a hazard occurs (where the damage will be known as in Type III and Type IV).**

“The objective of this paper is to propose a solution to determine a quick and approximate way to prioritize the order of repair interventions to maximize resilience, taking into consideration repair cost and travel costs during the recovery.” (page 4, line 58)

Recovery strategies based on actual damage are going to be more resilient but can be computationally more time consuming. We wanted to explore strategies that allowed us to do much of the computation before the event. Studying Type I and II allowed up to set an experimental analysis of alternative recovery plans both with and without the damage information available. The main purpose is to make the comparison available with the other results.

This paragraph is added (page 10 line 21 to line 29):

“…. Although this paper focuses on prioritizing links for network recovery, Type I and II analysis (without any damage) permits comparison with Type III and IV (requiring information on damage) to determine the value of information about damage with respect to network recovery. …..”

1. **There seems to be a technical problem throughout the manuscript where some tables are not listed and it instead says, “Error! Reference source not found” (e.g., page 10).**

The lost links are added (page 11 line 27 to line 29, and page 12 line 5):

“…The planning horizon is a function of the recovery period, which in this case is relatively short, therefore, the analysis does not take account of the time value of money. An example of the selection of an intervention is shown in Figure 1, Table 1, and Table 2, assuming there are three interventions.”

“…The results from the incremental benefit cost analysis are shown in Table 2.”

1. **On Figure 1, the Symbology is not very clear especially for the markers. For example, maybe using a circle marker instead of a vertical line marker would be more distinctive. Additionally, maybe making the lines all gray would help because the markers are currently hidden.**

Thank you for the suggestion. The symbology and the line marking of Figure 1 are revised as Page 29 Figure 1.

1. **For Figure 2, the legend should specify that the additional cost shaded is for intervention 3 only.**

Thank you for the correction. The legend of Figure 2 is revised as page 29 Figure 2.

Additional indirect

cost

1. **For the case study, figure(s) which display the network model would be helpful. Right now, it is very hard to visualize the model. Additionally, figure(s) which can show where the damage is located (and to what extent) would be helpful.**

Figure 3, showing the network model and the location of damage, has been added. The ID column in Table 5 and Table 9 showing the segment type and damage state for each link are also shown in Figure 3.

The following changes have been made to the paper (page 12 line 36 to line 39, and page 15 line 28):

“The example road network is located in the Rhine Valley around the city of Chur, Switzerland, shown in Figure 3.”

“The second column shows the segment ID, which is also represented on the map in Figure 3.”


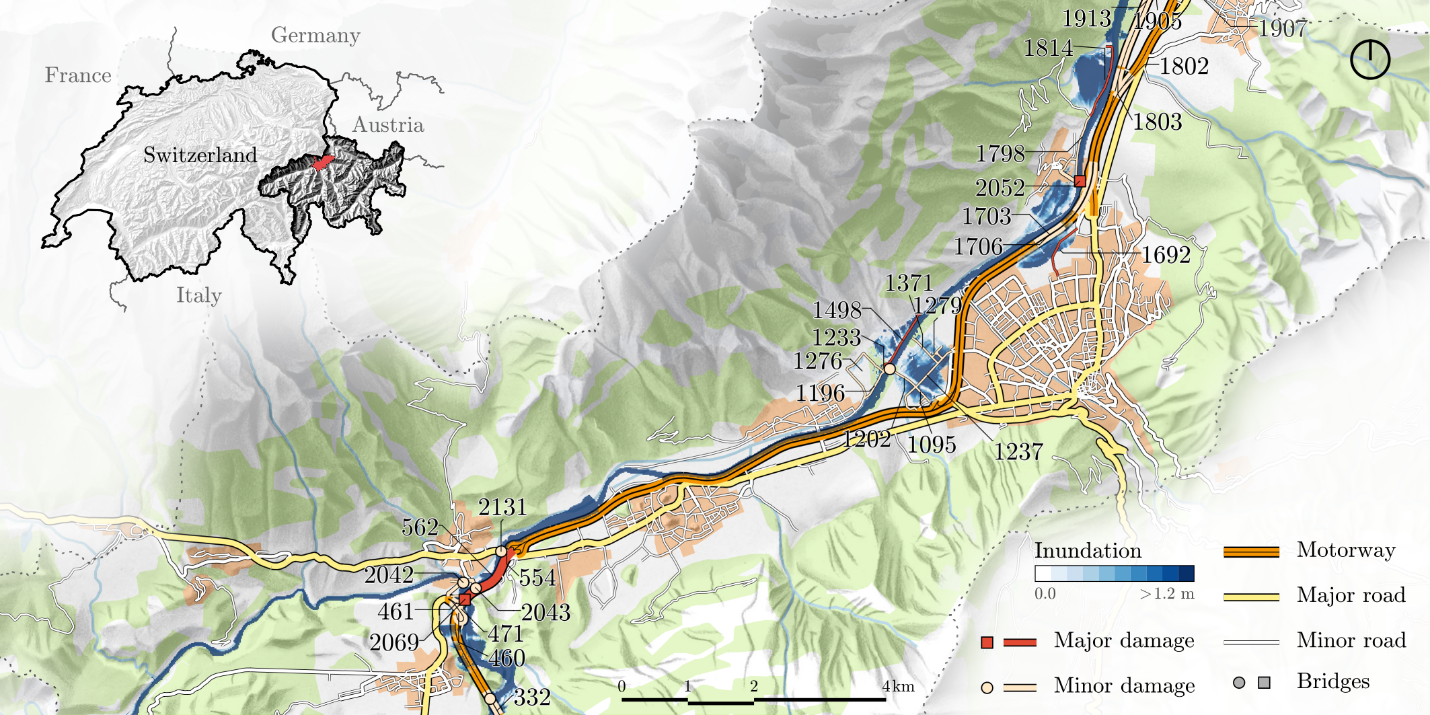


1. **For the case study, more detail should be given on how the damage state and O-D matrix were found.**

Hackl et al. 2018a and Hackl et al 2018b describe the sources. The damage state is derived from fragility and function loss functions (Lam and Adey 2016)[[1]](#footnote-1), using a flood simulation with a 500-year return period. The OD matrix is estimated by a gravity distribution model based on the Swiss national traffic model (FOSD, 2015)[[2]](#footnote-2). This paper uses the same data for consistency to facilitate the comparison of the results.

The following text is revised (page 12, lines 2-10):

“The study area is divided into 37 traffic analysis zones (TAZs), and traffic demand is represented by a 37 by 37 origin-destination (OD) matrix. A hypothetical extreme flood event is considered that results in 29 disrupted segments consisting of 24 road segments and 5 bridge elements that are to be restored.”

The revised text is (page 12 line 54 to page 13 line 5):

“The study area is divided into 37 traffic analysis zones (TAZs), and traffic demand is represented by a 37 by 37 origin-destination (OD) matrix estimated by Hackl et al (2018a) using a gravity model. A hypothetical 500-year return period flood event is simulated by Hackl et al (2018b) to determine the 29 disrupted segments based on fragility and loss functions. The 29 disrupted segments consist of 24 road segments and 5 bridge elements that are to be restored.”

1. **The authors note that the network is composed of nodes and links and then in parenthesis note that there are 2,011 road segments and 116 bridges (page 12). Can the authors be a bit more descriptive here? Are the bridges modeled as nodes? What do the other nodes represent? Again, a figure would really help here.**

The studied network is based on Hackl et al. 2018a. Their network models are extracted from shape files. The nodes are centroids, junctions, and changes in road geometric features. The links connected by nodes are road segments and bridges with their directions, length, free flow speed, and capacity. The reader is referred to Hackl et al. 2018a and some more description is added to the paper.

The original text is (page 11 line 55 to page 12 line 2):

The example road network is located in the Rhine Valley around the city of Chur, Switzerland. This area is exposed to recurrent floods and landslides that affect the traffic throughout the region (Hackl et al. 2018b). The road network is composed of 1,520 nodes and 2,153 links (2,011 road segments and 116 bridges).

The revised sentences (page 12 line 37 to line 53) and as mentioned in response to comment 6, Figure 3 are added:

“The example road network is located in the Rhine Valley around the city of Chur, Switzerland, shown in Figure 3. This area is exposed to recurrent floods and landslides that affect the traffic throughout the region (Hackl et al. 2018b). To simplify the analysis, the studied network is assumed to consist only of the national road (51 km), main roads (165 km), and minor roads (395 km) and modelled as a graph composed of 1,520 nodes (37 centroids, 1056 junctions, and 427 changes in road geometric features) and 2,153 directed links (representing road segments and bridges). For further details of the network refer to Hackl et al. (2018a).”

1. **In results and discussion, (page 13, line 54) it is unclear what the authors mean when they say visual inspection.**

Our statement was cryptic. In considering how to explain the results, we found we needed to make some additional corrections. These are summarized as:

1. Add a description of the heuristic used to select links for repair based on constraints,
2. Introduce the resource constraints (presented as scenarios: page 15, lines 34-50 in the original submission),
3. Modify Table 5 to compare with Hackl’s results for scenario 3 (no constraints) and
4. Revise the entire paragraph is revised to explain our reasoning.

To address item 1), the following text has been added (page 12, line 18 to line 26);

“*Recovery strategy*

The recovery strategy is the repair order and the selected repair alternative for each link subject to any constraints, such as crew availability and budget. A simple algorithm, shown in Figure 4 is used to develop the schedule.


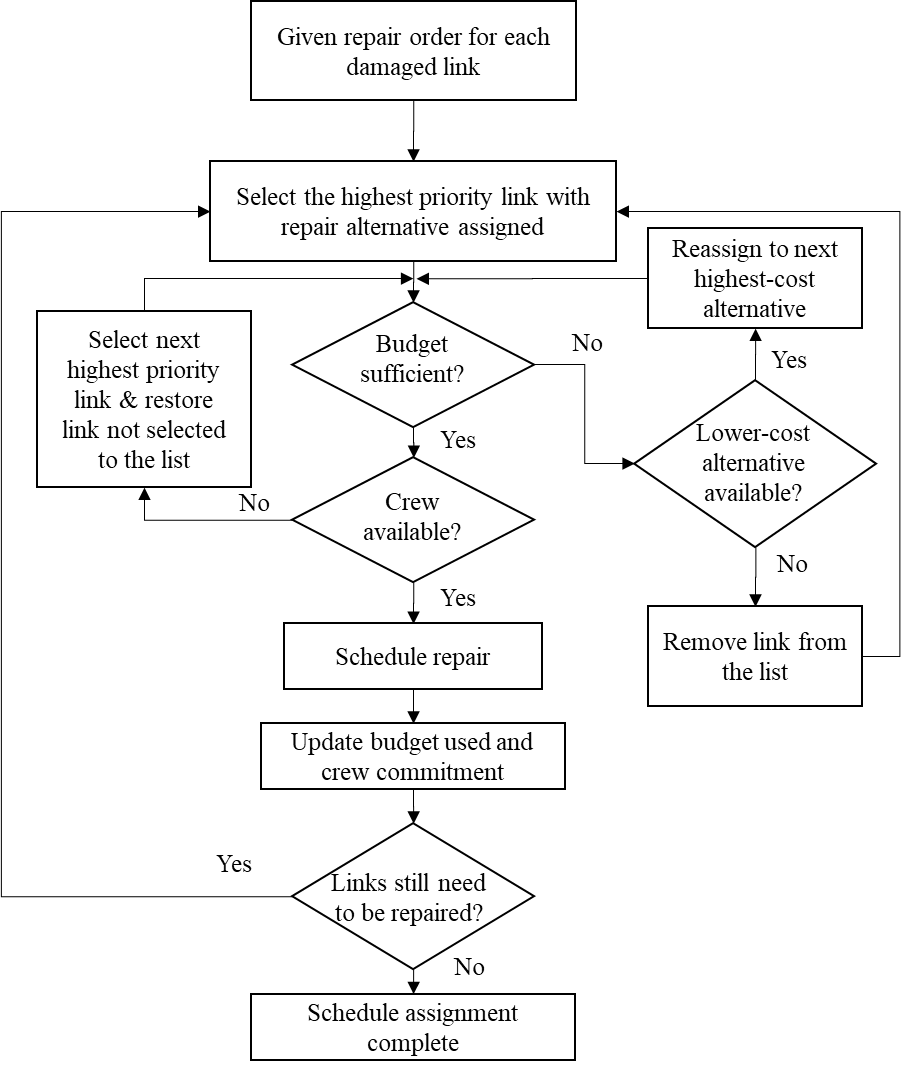


To address item 2, we move the description of the scenarios from page 15, line 34-50 in the original submission to resubmitted version page 14, line 41-53, at the end of the case study and before the Results and Discussion section.

“The case study uses three scenarios to illustrate different types of constraints assuming up to three crews (a, b and c) are available (Hackl et al. 2018a):

Scenario 1: Crew b is not available until day 5 and Crew c is not available between days 10 and 15.

Scenario 2: Crew b is not available until day 5 and Crew c is not available between days 10 and 15, and repair budget is 3,630,000 mu.

Scenario 3: No constraints”

To address item 3, we revise the following original text (page 13, line 53 to page 14 line 3):

“The repair order for each of the four types of criticality measures is determined and the intervention methods selected. The results are tabulated in Table 5. The segments are sorted according to the priority determined by Hackl et al (2018a). Visual inspection suggests that the prioritization is highly correlated between the Type I and Type II MNRI prioritization and the Type III and Type IV MNRI prioritization. This is supported by Spearman rank-order correlations shown in Table 6. The correlations also show that the repair order using the MNRI are highly correlated with the near optimal repair order determined by Hackl (2018a).”

Revised text (page 15, line 1 to page 16, line 9):

“*Results and Discussion*

The recovery strategy combines the method to select the repair order and the method to select the repair alternative, subject to constraints. The results are tabulated in Table 5 for the following assumptions:

- Repair order
  - Pre-event MNRI
    - Type I - full closure; Type II – partial closure
  - Post-event MNRI
    - Type III – fully restored; Type IV – partially restored
- Repair alternative
  - Pre-event
    - 30-day, 40-day, and 50-day planning horizons
  - Post-event
    - 30-day, 40-day, and 50-day planning horizons

The segments are sorted according to the priority determined by Hackl et al (2018a) for Scenario 3 (no constraints). The repair order, based on the MNRI, as shown in Table 5 also assumes no constraints. The second column shows the segment ID, which is also shown on the map in Figure 3.

Comparing the repair order for Type I and Type II, reveals that fifteen of the links have the same repair order; they are the last and next to last to be repaired. In the case of Type III and Type IV repair order, the results are the same for each link. These results are not surprising. Using the pre-event MNRI, the criticality of the link for low priority links is going to be the same whether the link is fully closed or partially closed. These links carry low volumes of traffic. In the case of the post-event MNRI for this network, fully or partially restoring any link has the same impact on the network because the traffic volume is relatively low in this network. These observations are supported by Spearman rank-order correlations shown in Table 6. The correlations also show that the repair order using the MNRI are modestly correlated with the near optimal repair order determined by Hackl (2018a).

Differences in the repair order determined using different methods are glaring for some links. For example, link ID 1095 is ranked 6th by Hackl et al. and 16th, 16th, 15th and 15th using the Type I, II, III and IV MNRI methods. However, the overall similarity based on the rank correlation suggests further evaluation of the repair schedule is warranted. This line is pursued in the following paragraphs.”

1. **For this case study, it is unclear why there is a pre-event scenario.**

Based on comment 2. we modified page 4, line 58 to line 61. Based on this comment we have also expounded on the objective of the paper.

Original text: (page 4, line 58)

“The objective of this paper is to propose a solution to determine a quick and approximate way to prioritize the order of repair interventions to maximize resilience, taking into consideration repair cost and travel costs during the recovery.”

Revised text: (page 4, line 53 to page 5, line 17 in the revised paper):

“The objective of this paper is to propose a solution to determine a quick and approximate way to prioritize the order of repair interventions to maximize resilience, taking into consideration repair cost and travel costs during the recovery. Recovery strategies based on actual damage are going to be more resilient but require computation after the event when there is pressure to deploy resources as quickly and effectively as possible. The paper explores decision methods that allow much of the computational effort to be expended prior to an event and compares the recovery plan with more computationally intense near-optimal plans and simple, less computationally intense methods that use actual damage data. The strategy draws on experiences that suggest that there are many near optimal solutions.”

1. **It is very interesting that partial vs. full recovery doesn’t make a difference (page 14). Can the authors elaborate a bit more on this and explain why this is happening?**

The reason that partial vs. full recovery doesn’t make a difference to the repair order is the relative low OD demand in this network resulting in an uncongested network. We have alluded to this in our revised text responding to comment 9 (item 3). We also added the following explanation at the end of the relevant paragraph (page 16 line 29 to line 36):

“The post-event analysis reveals that during the recovery period, partial or full recovery does not make a difference in the reduction of additional indirect cost (these results are perfectly correlated as shown in Table 6). It is attributed to the small demand of the studied region.”

1. **The authors compare their results to the results of simulated annealing done in the work by Hackl et al. (2018a). Although the authors claim that the repair order is similar for both methods (page 14, line 1), Table 5 does not seem to support this. Additionally, the authors note that the cost is similar for both approaches. Are the costs calculated the same way in both approaches?**

We do not use the word “similar” but state “the repair order using the MNRI are modestly correlated with the near optimal repair order determined by Hackl (2018a).” Therefore, we need to explain our reasoning, which we added to our response to comment 9 (item 3) in the last paragraph.

The cost data and methods used to make decision are identical for both papers. We have modified the following text (page 15, line 52):

“The results are shown in Table 8 and the discussion follows.”

To (page 17, lines 41 to line 46):

“The results, based on data and methods for determining costs from Hackl et al. (2018a), are shown in Table 8 and the discussion follows.”

1. **Page 15, line 57, these sentences should be reviewed. The repeated use of the word, “here” results in a lack of clarity.**

The sentences are revised (page 17 line 48 to line 53) as follows:

“In scenario 2, the suggested intervention methods above need to be adjusted to account for the budget constraint. There are two alternatives to be considered: either apply intervention 3 for all damaged links, or not to repair all damaged links.”

**Reviewer 2:**

1. **The network is underspecified such that the results cannot be interpreted. The following items should be included. (The reviewer appreciates that some of this is in a referenced paper, but the items are critical to understanding the paper as a somewhat self-contained document.)**

**(a) A map of the network, including locations of the damaged components and some sense of where heavy flows in the network are. Without some sense of the topology of the system and locations of damage, it is hard to understand the robustness of these results.**

**(b) Labels indicating bridge numbers, so that Table 5 is meaningful.**

We agree with these comments.

1. Figure 3 is added to show the network model and the location of damage. In response to Reviewer #1’s comments (Comment # 6 and #8) the text has been revised to refer to this figure.
2. We have indicated bridges in Table 5 by bolding the ID. The ID in Figure 3 and Table 5 is also included in Table 9. Table 9 includes information about each segment type and damage state.
3. **The cost units introduced in the paper need further context. It is appreciated that somewhat arbitrary costs are appropriate given the parametric nature of the study, and the difficulty of obtaining real costs. But is there any empirical grounding for these choices? Seeing a cost of 29.5 per hour for travel, versus a cost of 16 to repair a bridge, is non-intuitive (I would expect the latter to be much larger than the former).**

The notation and cost units were not clearly defined in Table 4. The fixed cost, variable cost, and resource cost are all presented in 1000 mu. The cost are mainly based on the literature of (Hackl et al. 2018a) (as stated: page 13, line 19). Table 4 is revised to make the units clearer.


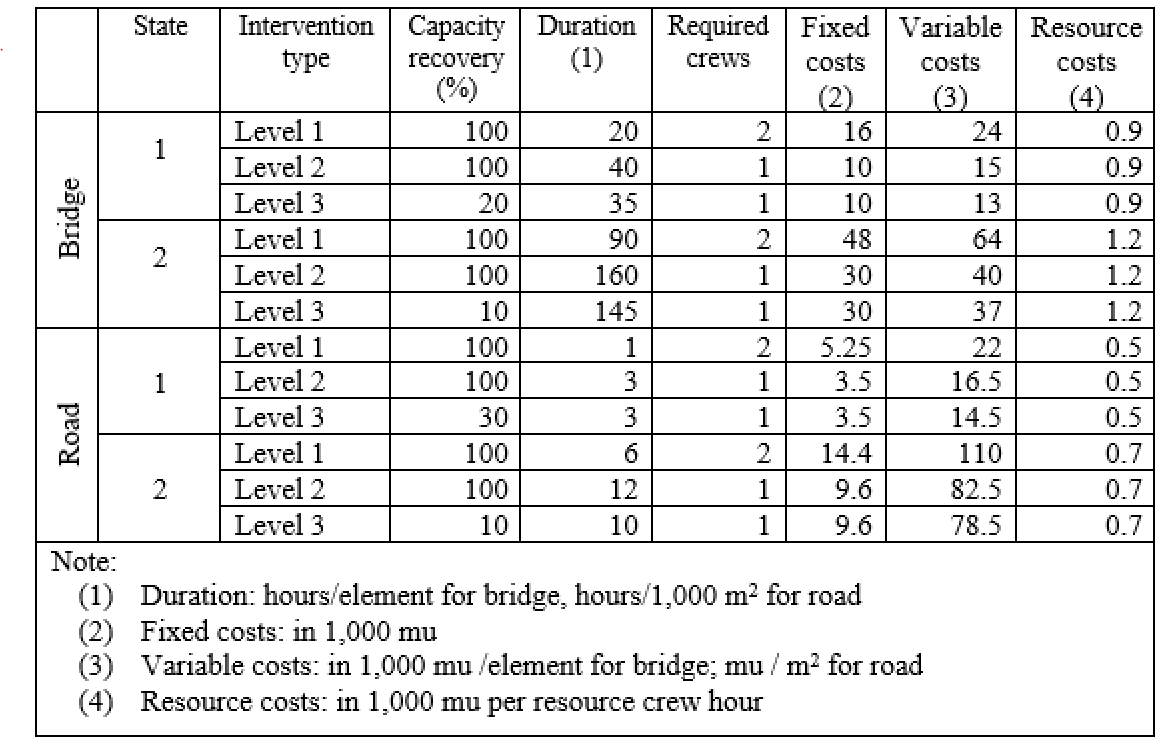


1. **Top of page 11, it is hard to understand the reported cost reductions that are over differing time periods (e.g., ‘reduces ... from 763,377 mu after 7.5 days ...). Are these cumulative costs (in which case the duration would seem to affect them) or costs per day?**

These cost reductions are in the cost per day. This was not clear.

The paragraph is revised (changes are underlined here but not in the text) as (page 11 line 29 to page 12 line 3):

“As Figure 1 shows, different interventions selected will result in various recovery paths and durations taken to complete the repair. In this case, Intervention 1 reduces indirect costs (travel time, travel distance and loss of connectivity) from 763,377 mu/day after 7.5 days to 728,980 mu/day (initial status); Intervention 2 reduces indirect costs by the same amount but only after 15.5 days; and Intervention 3 reduces indirect costs from 763,377 mu/day to 741,546 mu/day after 12.5 days. The range of possible planning horizons may be quickly estimated by assigning either the fastest or the slowest intervention method to all the damaged segments. To illustrate the computation of the incremental benefits and costs, this example uses a planning horizon (that is based on the expected recovery period) of 30 days. The area between the path and initial status is computed as the change of indirect cost. For example, for Intervention 3, the additional indirect cost is shown in Figure 2 and computed as 12.5 days times the reduction in indirect cost (763, 377 – 728,980 mu/day) plus 17.5 days times the additional indirect cost (741,546 – 728,980 mu/day) as the link is not fully repaired.”

1. **The manuscript focuses exclusively on results from the case study network to support the conclusion that this heuristic metric is valuable. Some additional discussion of the potential generality of this finding would add a lot of valuable context. Specifically, if the damaged components are located in somewhat ‘distinct’ parts of the network, then it is intuitive that studying their individual impacts on the network is a good indicator of their joint impact.**

**If, however, there are many damaged components in series, then it is less intuitively obvious that considering the benefits of individual bridge repairs will be useful. Taken to the limit, if a link has two bridges in series requiring repairs in order to function, then metrics looking at either of the bridges individually will suggest that they are not useful. Some discussion of this type of situation would be quite helpful.**

This comment makes two very good points. The first point is to acknowledge in a general sense that our results are specific to this network. The second point is that network connectivity may be impeded by multiple damage links in serial.

The first point is addressed with the addition of the following (page 20, line 7 to line 14):

“An important limitation of this work, is that our simple algorithm was only tested on one network. This network has relatively low traffic volumes but also had damaged segments that isolated subnetworks. Generalization on our conclusions requires extensive sensitivity analysis and testing on other networks.”

The second point is addressed with the addition of the following (page 19, line 47 to page 20, line 5):

“The resilience measure is intended to capture usage and network connectivity, appropriate measures of accessibility and mobility. The different types of resilience measures are used to demonstrate the value of knowing which links are damaged. The modified network robustness index (MNRI) is based on the reduction in travel costs if a damaged link in a disrupted network is repaired and the other links are still disrupted. While the measure does not capture dependencies, a such as damaged links in serial, the lack of redundancy and loss of connectivity is captured, as well as the relative importance of highly travelled links.”

1. **On pages 9-10 the authors introduce four types of prioritization, but then never return to evaluations of their relative merits (other than noting that some of them are correlated) or a recommendation of a preferred type. Either add some interpretation, or avoid this tangential introduction of various permutations.**

Agreed. Our explanation of the types and why we are using them was cryptic. Our response and modifications to the paper in response to comment 1 and 2 by reviewer #1 is attended to partially address this issue. On page 18 we revise the text to connect the results back to the different types of prioritization and underscore the value of this information.

Modifications are underlined (page 18, lines 15 to 49):

“Table 8 also compares the results using the five strategies with the results from Hackl et al (2018a) for a benchmark and a heuristic algorithm based on simulated annealing (SA) using the total cost consisting of the repair cost and indirect costs. The benchmark used travel volume of each segment during normal status to assign the repair order followed with the assigned intervention method by SA. The heuristic algorithm uses simulated annealing to find a near optimal solution. Overall, the results for the five strategies and Hackl et al.’s solution methods provide some insights into the decision process. The results arranged by pre-event MNRI (Type I and Type II) are significantly costlier (18.82% more for Scenario 1, 19.65% more for Scenario 2, and 28.42% more for Scenario 3) than the heuristic (SA) results. In contrast, the results arranged by post-event order (Type III and Type IV) are relatively comparable to the heuristic results (0.45% more for Scenario 1, 0.60% more for Scenario 2, and 1.05% more for Scenario 3). Using knowledge of the actual damage (Type III and Type IV) to determine the criticality of each segment is constructive information that enhances the solution. In this case study, the results are within 1% of the heuristic.”

1. **In the conclusion, it is not clear what exactly the authors are recommending based on this study. There are comments about the general problem domain and a description of a two stage method being generally ‘valuable,’ but no statements about a recommended approach or what the basis of this recommendation is. Some more definitive conclusion is needed.**

Good suggestion. We added a recommendation to page 20 line 29 to line 44:

“That is, a relatively simple two stage method for first, determining the intervention action, and then prioritizing the links for repair using a modified network robustness index is computationally efficient and delivers result that perform similarly in terms of costs to a near optimal heuristic based on simulated annealing. The algorithms also perform well when simple rules are added to account for crew and budget constraints.”

1. **Pages 10-11, there are several broken reference links.**

As discussed in the response to Reviewer #1, comment #3, these lost links are added (page 11 line 22 to line 29, and page 12 line 5) as:

“…The planning horizon is a function of the recovery period, which in this case is relatively short, therefore, the analysis does not take account of the time value of money. An example of the selection of an intervention is shown in Figure 1, Table 1, and Table 2, assuming there are three interventions.”

“…The results from the incremental benefit cost analysis are shown in Table 2.”

1. **Pages 14-15 and Table 5, the discussion of segment IDs is not helpful, as these IDs are not defined anywhere. Hopefully this will be addressed by comment 1 above, but something more is needed for a reader to understand this information.**

Agreed. In response to Comment #1, we added Figure 3 to show the network model and the location of damage. The ID in the Figure 3 are same as ID column of Table 5 and can be also referred to the column of ID in Table 9 for the segment type and damage state. We have noted these references in the text.

1. Lam, J. C. & Adey, B. T. (2016), Functional loss assessment and restoration analysis to quantify indirect consequences of hazards, *ASCE-ASME Journal of Risk and Uncertainty in Engineering Systems, Part A: Civil Engineering*., 2(4), 04016008. [↑](#footnote-ref-1)
2. FOSD (2015), *Nationales Personenverkehrsmodell des UVEK, Aktualisierung aufden Basiszustand 2010*, Report, Federal Office for Spatial Development (FOSD), Bern, Switzerland. [↑](#footnote-ref-2)
